# Supplementary material for: Medication-Related Problems in Older People with Multimorbidity in Catalonia: A Real-World Data Study with 5 Years’ Follow-Up
Source: PubMed Central journal article supplement (PMC7916946; doi:10.3390/jcm10040709), 2021-02-11
Supplement: jcm-10-00709-s001.pdf [file jcm-10-00709-s001.pdf]

**Table S1.** Age-adjusted association between medication-related problems and multimorbidity.

| Medication-Related Problems                       | Age<br>OR (95% CI)<br>( <i>p</i> -value)   | 2–4 Diseases Influence,<br>Age Adjusted<br>OR (95% CI)<br>( <i>p</i> -value) | 5–9 diseases Influence,<br>Age Adjusted<br>OR (95% CI)<br>( <i>p</i> -value) | ≥10 diseases Influence,<br>Age Adjusted<br>OR (95% CI)<br>( <i>p</i> -value) | Age Influence,<br>Multimorbidity Adjusted<br>OR (95% CI)<br>( <i>p</i> -value) |
|---------------------------------------------------|--------------------------------------------|------------------------------------------------------------------------------|------------------------------------------------------------------------------|------------------------------------------------------------------------------|--------------------------------------------------------------------------------|
| Duplicate therapy                                 | 1.01 (1.011–1.014)<br>( <i>&lt;</i> 0.001) | 3.76 (3.53–4.01)<br>( <i>&lt;</i> 0.001)                                     | 7.49 (7.04–7.97)<br>( <i>&lt;</i> 0.001)                                     | 13.21 (12.40–14.09)<br>( <i>&lt;</i> 0.001)                                  | 1 (0.998–1)<br>(0.76)                                                          |
| Drug-drug interaction                             | 1.03 (1.022–1.030)<br>( <i>&lt;</i> 0.001) | 3.48 (2.70–4.58)<br>( <i>&lt;</i> 0.001)                                     | 8.10 (6.33–10.60)<br>( <i>&lt;</i> 0.001)                                    | 19.85 (15.46–26.03)<br>( <i>&lt;</i> 0.001)                                  | 1.01 (1.006–1.014)<br>( <i>&lt;</i> 0.001)                                     |
| Contraindicated drugs in CKD                      | 1.08 (1.075–1.077)<br>( <i>&lt;</i> 0.001) | 59.61 (41.76–89.23)<br>( <i>&lt;</i> 0.001)                                  | 269.47 (188.92–403.11)<br>( <i>&lt;</i> 0.001)                               | 695.72 (487.66–1040.92)<br>( <i>&lt;</i> 0.001)                              | 1.06 (1.061–1.063)<br>( <i>&lt;</i> 0.001)                                     |
| Contraindicated drugs in liver disease            | 0.98 (0.980–0.983)<br>( <i>&lt;</i> 0.001) | 7.45 (6.37–8.77)<br>( <i>&lt;</i> 0.001)                                     | 17.51 (15–20.59)<br>( <i>&lt;</i> 0.001)                                     | 35.30 (30.22–42.57)<br>( <i>&lt;</i> 0.001)                                  | 0.96 (0.963–0.970)<br>( <i>&lt;</i> 0.001)                                     |
| Potentially inappropriate medication              | 1.04 (1.040–1.042)<br>( <i>&lt;</i> 0.001) | 4.25 (4.15–4.36)<br>( <i>&lt;</i> 0.001)                                     | 12.04 (11.75–12.33)<br>( <i>&lt;</i> 0.001)                                  | 34.89 (33.83–36)<br>( <i>&lt;</i> 0.001)                                     | 1.02 (1.023–1.025)<br>( <i>&lt;</i> 0.001)                                     |
| Anticholinergic effect-anticholinergic load score |                                            |                                                                              |                                                                              |                                                                              |                                                                                |
| 1                                                 | 1 (1.002–1.004)<br>( <i>&lt;</i> 0.001)    | 0.94 (0.89–1)<br>(0.04)                                                      | 1.24 (1.17–1.31)<br>( <i>&lt;</i> 0.001)                                     | 1.91 (1.81–2.03)<br>( <i>&lt;</i> 0.001)                                     | 1 (0.998–1)<br>(0.02)                                                          |
| 2                                                 | 1 (1–1.003)<br>(0.005)                     | 1.12 (1.03–1.21)<br>(0.006)                                                  | 1.73 (1.60–1.87)<br>( <i>&lt;</i> 0.001)                                     | 2.93 (2.71–3.17)<br>( <i>&lt;</i> 0.001)                                     | 1 (0.994–0.997)<br>( <i>&lt;</i> 0.001)                                        |
| 3 -5                                              | 1 (0.996–1)<br>(0.28)                      | 1.13 (0.98–1.30)<br>(0.08)                                                   | 2.38 (2.08–2.73)<br>( <i>&lt;</i> 0.001)                                     | 5.77 (5.04–6.61)<br>( <i>&lt;</i> 0.001)                                     | 0.99 (0.986–0.990)<br>( <i>&lt;</i> 0.001)                                     |
| ≥ 6                                               | 0.99 (0.986–0.988)<br>( <i>&lt;</i> 0.001) | 1.52 (1.17–1.99)<br>(0.002)                                                  | 3.56 (2.79–4.54)<br>( <i>&lt;</i> 0.001)                                     | 13.04 (10.04–16.92)<br>( <i>&lt;</i> 0.001)                                  | 0.95 (0.943–0.964)<br>( <i>&lt;</i> 0.001)                                     |
| Increase in fall risk                             | 1 (1.008–1.010)<br>( <i>&lt;</i> 0.001)    | 0.95 (0.91–1)<br>(0.03)                                                      | 1.12 (1.07–1.17)<br>( <i>&lt;</i> 0.001)                                     | 1.65 (1.57–1.73)<br>( <i>&lt;</i> 0.001)                                     | 1 (1.005–1.007)<br>( <i>&lt;</i> 0.001)                                        |
| Effect on QT interval                             | 1.02 (1.019–1.022)<br>( <i>&lt;</i> 0.001) | 1.07 (1–1.15)<br>(0.03)                                                      | 1.53 (1.43–1.64)<br>( <i>&lt;</i> 0.001)                                     | 2.43 (2.27–2.60)<br>( <i>&lt;</i> 0.001)                                     | 1.02 (1.014–1.017)<br>( <i>&lt;</i> 0.001)                                     |

|                                                        |                                    |                                  |                                  |                                  |                                    |
|--------------------------------------------------------|------------------------------------|----------------------------------|----------------------------------|----------------------------------|------------------------------------|
| Antiulcer agents without criteria for gastroprotection | 1.03 (1.029–1.031)<br>( $<0.001$ ) | 1.18 (1.13–1.24)<br>( $<0.001$ ) | 1.58 (1.50–1.65)<br>( $<0.001$ ) | 1.95 (1.86–2.04)<br>( $<0.001$ ) | 1.03 (1.025–1.027)<br>( $<0.001$ ) |
| Other drugs not recommended for older people           | 1.02 (1.017–1.019)<br>( $<0.001$ ) | 1.66 (1.57–1.75)<br>( $<0.001$ ) | 2.48 (2.35–2.62)<br>( $<0.001$ ) | 3.84 (3.64–4.06)<br>( $<0.001$ ) | 1.01 (1.011–1.013)<br>( $<0.001$ ) |
| Patients needing gastroprotection                      | 0.99 (0.978–0.996)<br>(0.004)      | 1.06 (0.71–1.67)<br>(0.79)       | 1.04 (0.70–1.63)<br>(0.85)       | 0.81 (0.54–1.30)<br>(0.36)       | 0.99 (0.980–0.997)<br>(0.01)       |

CKD: chronic kidney disease.

**Table S2.** Number of contraindicated drugs in chronic kidney disease and liver disease and potentially inappropriate medications in older people by multimorbidity group at the end of the study, 2016 (N = 723,016).

| Medication-Related Problems                   | Number of Drug† | N Comorbidities                      |                                      |                                      | Total<br>N = 723,016<br>n (%) |
|-----------------------------------------------|-----------------|--------------------------------------|--------------------------------------|--------------------------------------|-------------------------------|
|                                               |                 | 2–4 Diseases<br>N = 137,799<br>n (%) | 5–9 Diseases<br>N = 393,672<br>n (%) | ≥10 Diseases<br>N = 191,545<br>n (%) |                               |
| Contraindicated drugs in CKD, n (%)           | 0               | 132,600 (96.23%)                     | 330,864 (84.05%)                     | 125,583 (65.56%)                     | 589,047 (81.47%)              |
|                                               | 1               | 3,988 (2.89%)                        | 37,687 (9.57%)                       | 32,006 (16.71%)                      | 73,681 (10.19%)               |
|                                               | 2               | 964 (0.70%)                          | 17,557 (4.46%)                       | 20,959 (10.94%)                      | 39,480 (5.46%)                |
|                                               | 3               | 203 (0.15%)                          | 5,891 (1.50%)                        | 9,282 (4.85%)                        | 15,376 (2.13%)                |
|                                               | 4               | 35 (0.03%)                           | 1,371 (0.35%)                        | 2,833 (1.48%)                        | 4,239 (0.59%)                 |
|                                               | 5               | 6 (0.00%)                            | 252 (0.06%)                          | 682 (0.36%)                          | 940 (0.13%)                   |
|                                               | 6               | 3 (0.00%)                            | 44 (0.01%)                           | 165 (0.09%)                          | 212 (0.03%)                   |
|                                               | 7               | 0 (0.00%)                            | 6 (0.00%)                            | 29 (0.02%)                           | 35 (0.00%)                    |
|                                               | 8               | 0 (0.00%)                            | 0 (0.00%)                            | 5 (0.00%)                            | 5 (0.00%)                     |
|                                               | 11              | 0 (0.00%)                            | 0 (0.00%)                            | 1 (0.00%)                            | 1 (0.00%)                     |
| Contraindicated drugs in liver disease, n (%) | 0               | 135,304 (98.19%)                     | 375,713 (95.44%)                     | 173,755 (90.71%)                     | 684,772 (94.71%)              |
|                                               | 1               | 1,594 (1.16%)                        | 8,761 (2.23%)                        | 6,639 (3.47%)                        | 16,994 (2.35%)                |
|                                               | 2               | 701 (0.51%)                          | 5,496 (1.40%)                        | 5,256 (2.74%)                        | 11,453 (1.58%)                |
|                                               | 3               | 172 (0.12%)                          | 2,695 (0.68%)                        | 3,710 (1.94%)                        | 6,577 (0.91%)                 |
|                                               | 4               | 22 (0.02%)                           | 783 (0.20%)                          | 1,540 (0.80%)                        | 2,345 (0.32%)                 |
|                                               | 5               | 5 (0.00%)                            | 178 (0.05%)                          | 500 (0.26%)                          | 683 (0.09%)                   |
|                                               | 6               | 1 (0.00%)                            | 36 (0.01%)                           | 128 (0.07%)                          | 165 (0.02%)                   |
|                                               | 7               | 0 (0.00%)                            | 8 (0.00%)                            | 12 (0.01%)                           | 20 (0.00%)                    |
|                                               | 8               | 0 (0.00%)                            | 2 (0.00%)                            | 5 (0.00%)                            | 7 (0.00%)                     |
| Potentially inappropriate medication, n (%)   | 0               | 77,446 (56.20%)                      | 111,522 (28.33%)                     | 19,904 (10.39%)                      | 208,872 (28.88%)              |
|                                               | 1               | 31,539 (22.89%)                      | 99,893 (25.37%)                      | 32,684 (17.06%)                      | 164,116 (22.69%)              |
|                                               | 2               | 14,892 (10.81%)                      | 72,962 (18.53%)                      | 36,742 (19.18%)                      | 124,596 (17.23%)              |
|                                               | 3               | 7,114 (5.16%)                        | 45,507 (11.56%)                      | 31,208 (16.29%)                      | 83,829 (11.59%)               |
|                                               | 4               | 3,475 (2.52%)                        | 27,568 (7.00%)                       | 23,677 (12.4%)                       | 54,720 (7.57%)                |
|                                               | 5               | 1,632 (1.18%)                        | 15,895 (4.04%)                       | 17,204 (8.98%)                       | 34,731 (4.80%)                |
|                                               | 6               | 818 (0.59%)                          | 9,061 (2.30%)                        | 11,806 (6.16%)                       | 21,685 (3.00%)                |
|                                               | 7               | 404 (0.29%)                          | 5,171 (1.31%)                        | 7,366 (3.85%)                        | 12,941 (1.79%)                |
|                                               | 8               | 237 (0.17%)                          | 2,888 (0.73%)                        | 4,740 (2.47%)                        | 7,865 (1.09%)                 |
|                                               | 9               | 122 (0.09%)                          | 1,509 (0.38%)                        | 2,736 (1.43%)                        | 4,367 (0.60%)                 |
|                                               | ≥ 10            | 120 (0.09%)                          | 1,696 (0.43%)                        | 3,478 (1.82%)                        | 5,294 (0.73%)                 |

†Number of drugs according to the fifth levels of the Anatomical Therapeutic Chemical Classification System (ATC); CKD: chronic kidney disease; Note: All variables of the table showed a significant difference ( $p < 0.001$ ) between multimorbidity groups.

**Table S3.** Twenty most contraindicated drugs in chronic kidney disease in older people by multimorbidity group at the end of the study, 2016 (N = 723,016).

| ATC Code (Drug),<br>n (%)                                  | N Comorbidities                      |                                      |                                      | Total<br>N = 723,016<br>n (%) |
|------------------------------------------------------------|--------------------------------------|--------------------------------------|--------------------------------------|-------------------------------|
|                                                            | 2–4 Diseases<br>N = 137,799<br>n (%) | 5–9 Diseases<br>N = 393,672<br>n (%) | ≥10 Diseases<br>N = 191,545<br>n (%) |                               |
| A10BA02 (Metformin)                                        | 488 (0.35%)                          | 12,990 (3.30%)                       | 17,590 (9.18%)                       | 31,068 (4.30%)                |
| C03AA03 (Hydrochlorothiazide)                              | 930 (0.67%)                          | 10,304 (2.62%)                       | 8,814 (4.60%)                        | 20,048 (2.77%)                |
| C09BA02 (Enalapril and diuretics)                          | 899 (0.65%)                          | 8,505 (2.16%)                        | 6,024 (3.14%)                        | 15,428 (2.13%)                |
| N06AB04 (Citalopram)                                       | 180 (0.13%)                          | 4,083 (1.04%)                        | 7,054 (3.68%)                        | 11,317 (1.57%)                |
| C09DA01 (Losartan and diuretics)                           | 465 (0.34%)                          | 5,056 (1.28%)                        | 4,812 (2.51%)                        | 10,333 (1.43%)                |
| A10BB09 (Gliclazide)                                       | 152 (0.11%)                          | 3,685 (0.94%)                        | 4,731 (2.47%)                        | 8,568 (1.19%)                 |
| N02AX02 (Tramadol)                                         | 89 (0.06%)                           | 2,693 (0.68%)                        | 5,243 (2.74%)                        | 8,025 (1.11%)                 |
| C09CA03 (Valsartan)                                        | 235 (0.17%)                          | 3,222 (0.82%)                        | 3,885 (2.03%)                        | 7,342 (1.02%)                 |
| C09DA03 (Valsartan and diuretics)                          | 290 (0.21%)                          | 3,227 (0.82%)                        | 2,989 (1.56%)                        | 6,506 (0.90%)                 |
| C03DA01 (Spironolactone)                                   | 62 (0.04%)                           | 1,804 (0.46%)                        | 4,409 (2.30%)                        | 6,275 (0.87%)                 |
| C08CA11 (Manidipine)                                       | 201 (0.15%)                          | 2,740 (0.70%)                        | 3,241 (1.69%)                        | 6,182 (0.86%)                 |
| M05BA04 (Alendronic acid)                                  | 102 (0.07%)                          | 1,961 (0.50%)                        | 3,606 (1.88%)                        | 5,669 (0.78%)                 |
| C09BA03 (Lisinopril and diuretics)                         | 256 (0.19%)                          | 2,605 (0.66%)                        | 2,011 (1.05%)                        | 4,872 (0.67%)                 |
| M01AE01 (Ibuprofen)                                        | 172 (0.12%)                          | 1,725 (0.44%)                        | 1,467 (0.77%)                        | 3,364 (0.47%)                 |
| C10AB05 (Fenofibrate)                                      | 84 (0.06%)                           | 1,434 (0.36%)                        | 1,652 (0.86%)                        | 3,170 (0.44%)                 |
| A10BD07 (Metformin and sitagliptin)                        | 42 (0.03%)                           | 1,287 (0.33%)                        | 1,649 (0.86%)                        | 2,978 (0.41%)                 |
| C03BA11 (Indapamide)                                       | 149 (0.11%)                          | 1,341 (0.34%)                        | 1,052 (0.55%)                        | 2,542 (0.35%)                 |
| C08CA13 (Lercanidipine)                                    | 71 (0.05%)                           | 1,163 (0.30%)                        | 1,233 (0.64%)                        | 2,467 (0.34%)                 |
| C03EA01 (Hydrochlorothiazide and potassium-sparing agents) | 97 (0.07%)                           | 1,279 (0.32%)                        | 1,015 (0.53%)                        | 2,391 (0.33%)                 |
| C09CA08 (Olmesartan medoxomil)                             | 91 (0.07%)                           | 1,047 (0.27%)                        | 1,086 (0.57%)                        | 2,224 (0.31%)                 |

ATC: Anatomical Therapeutic Chemical Classification System.

**Table S4.** Twenty most contraindicated drugs in liver disease in older people by multimorbidity group at the end of the study, 2016 (N = 723,016).

| ATC Code (Drug),<br>n (%)           | N Comorbidities                      |                                      |                                      | Total<br>N = 723,016<br>n (%) |
|-------------------------------------|--------------------------------------|--------------------------------------|--------------------------------------|-------------------------------|
|                                     | 2-4 Diseases<br>N = 137,799<br>n (%) | 5-9 Diseases<br>N = 393,672<br>n (%) | ≥10 Diseases<br>N = 191,545<br>n (%) |                               |
| C10AA01 (Simvastatin)               | 915 (0.66%)                          | 6,558 (1.67%)                        | 6,201 (3.24%)                        | 13,674 (1.89%)                |
| C03CA01 (Furosemide)                | 114 (0.08%)                          | 2,592 (0.66%)                        | 6,002 (3.13%)                        | 8,708 (1.20%)                 |
| A10BA02 (Metformin)                 | 318 (0.23%)                          | 3,430 (0.87%)                        | 3,750 (1.96%)                        | 7,498 (1.04%)                 |
| C10AA05 (Atorvastatin)              | 295 (0.21%)                          | 2,741 (0.70%)                        | 3,366 (1.76%)                        | 6,402 (0.89%)                 |
| C03AA03 (Hydrochlorothiazide)       | 277 (0.20%)                          | 1,920 (0.49%)                        | 1,654 (0.86%)                        | 3,851 (0.53%)                 |
| C09CA01 (Losartan)                  | 130 (0.09%)                          | 1,317 (0.33%)                        | 1,736 (0.91%)                        | 3,183 (0.44%)                 |
| N05CD06 (Lormetazepam)              | 107 (0.08%)                          | 1,212 (0.31%)                        | 1,705 (0.89%)                        | 3,024 (0.42%)                 |
| C09BA02 (Enalapril and diuretics)   | 249 (0.18%)                          | 1,572 (0.40%)                        | 1,055 (0.55%)                        | 2,876 (0.40%)                 |
| C09DA01 (Losartan and diuretics)    | 104 (0.08%)                          | 954 (0.24%)                          | 834 (0.44%)                          | 1,892 (0.26%)                 |
| C10AA03 (Pravastatin)               | 73 (0.05%)                           | 721 (0.18%)                          | 1,052 (0.55%)                        | 1,846 (0.26%)                 |
| C03CA04 (Torsemide)                 | 59 (0.04%)                           | 688 (0.17%)                          | 936 (0.49%)                          | 1,683 (0.23%)                 |
| C09CA03 (Valsartan)                 | 57 (0.04%)                           | 578 (0.15%)                          | 734 (0.38%)                          | 1,369 (0.19%)                 |
| C09DA03 (Valsartan and diuretics)   | 79 (0.06%)                           | 584 (0.15%)                          | 566 (0.30%)                          | 1,229 (0.17%)                 |
| A10BX02 (Repaglinide)               | 17 (0.01%)                           | 362 (0.09%)                          | 670 (0.35%)                          | 1,049 (0.15%)                 |
| C08CA11 (Manipipine)                | 27 (0.02%)                           | 353 (0.09%)                          | 471 (0.25%)                          | 851 (0.12%)                   |
| C09BA03 (Lisinopril and diuretics)  | 79 (0.06%)                           | 434 (0.11%)                          | 311 (0.16%)                          | 824 (0.11%)                   |
| A10BD07 (Metformin and sitagliptin) | 34 (0.02%)                           | 387 (0.10%)                          | 375 (0.20%)                          | 796 (0.11%)                   |
| A05AA02 (Ursodeoxycholic acid)      | 51 (0.04%)                           | 367 (0.09%)                          | 344 (0.18%)                          | 762 (0.11%)                   |
| C10AB05 (Fenofibrate)               | 26 (0.02%)                           | 313 (0.08%)                          | 331 (0.17%)                          | 670 (0.09%)                   |
| N05CF02 (Zolpidem)                  | 27 (0.02%)                           | 243 (0.06%)                          | 312 (0.16%)                          | 582 (0.08%)                   |

ATC: Anatomical Therapeutic Chemical Classification System.

**Table S5.** Twenty most potentially inappropriate medications in older people by multimorbidity group at the end of the study, 2016 (N = 723,016).

| ATC Code (Drug),<br>n (%)        | N Comorbidities                      |                                      |                                      | Total<br>N = 723,016<br>n (%) |
|----------------------------------|--------------------------------------|--------------------------------------|--------------------------------------|-------------------------------|
|                                  | 2–4 Diseases<br>N = 137,799<br>n (%) | 5–9 Diseases<br>N = 393,672<br>n (%) | ≥10 Diseases<br>N = 191,545<br>n (%) |                               |
| A02BC01 (Omeprazole)             | 13,838 (10.04%)                      | 88,575 (22.50%)                      | 66,343 (34.64%)                      | 168,756 (23.34%)              |
| N05BA06 (Lorazepam)              | 10,635 (7.72%)                       | 55,864 (14.19%)                      | 40,603 (21.20%)                      | 107,102 (14.81%)              |
| C07AB07 (Bisoprolol)             | 6,745 (4.89%)                        | 41,293 (10.49%)                      | 35,910 (18.75%)                      | 83,948 (11.61%)               |
| G04CA02 (Tamsulosin)             | 5,621 (4.08%)                        | 26,604 (6.76%)                       | 16,487 (8.61%)                       | 48,712 (6.74%)                |
| N05CD06 (Lormetazepam)           | 3,976 (2.89%)                        | 23,329 (5.93%)                       | 18,190 (9.50%)                       | 45,495 (6.29%)                |
| N02AX52 (Tramadol, combinations) | 2,409 (1.75%)                        | 18,022 (4.58%)                       | 14,879 (7.77%)                       | 35,310 (4.88%)                |
| N06AB04 (Citalopram)             | 2,262 (1.64%)                        | 17,098 (4.34%)                       | 15,382 (8.03%)                       | 34,742 (4.81%)                |
| N06AB06 (Sertraline)             | 1,794 (1.30%)                        | 14,811 (3.76%)                       | 15,733 (8.21%)                       | 32,338 (4.47%)                |
| N05BA12 (Alprazolam)             | 2,678 (1.94%)                        | 13,879 (3.53%)                       | 9,757 (5.09%)                        | 26,314 (3.64%)                |
| N02AX02 (Tramadol)               | 1,193 (0.87%)                        | 10,848 (2.76%)                       | 11,461 (5.98%)                       | 23,502 (3.25%)                |
| C07AB03 (Atenolol)               | 3,014 (2.19%)                        | 12,977 (3.30%)                       | 6,919 (3.61%)                        | 22,910 (3.17%)                |
| N06AB05 (Paroxetine)             | 1,802 (1.31%)                        | 11,389 (2.89%)                       | 9,103 (4.75%)                        | 22,294 (3.08%)                |
| N05AH04 (Quetiapine)             | 1,417 (1.03%)                        | 9,728 (2.47%)                        | 9,275 (4.84%)                        | 20,420 (2.82%)                |
| N05BA01 (Diazepam)               | 1,800 (1.31%)                        | 9,541 (2.42%)                        | 7,161 (3.74%)                        | 18,502 (2.56%)                |
| N06AX05 (Trazodone)              | 1,122 (0.81%)                        | 8,180 (2.08%)                        | 8,591 (4.49%)                        | 17,893 (2.47%)                |
| C02CA04 (Doxazosin)              | 1,505 (1.09%)                        | 8,938 (2.27%)                        | 6,879 (3.59%)                        | 17,322 (2.40%)                |
| C03CA01 (Furosemide)             | 555 (0.40%)                          | 6,594 (1.67%)                        | 9,899 (5.17%)                        | 17,048 (2.36%)                |
| C07AG02 (Carvedilol)             | 997 (0.72%)                          | 7,096 (1.80%)                        | 7,399 (3.86%)                        | 15,492 (2.14%)                |
| N02AB03 (Fentanyl)               | 498 (0.36%)                          | 5,926 (1.51%)                        | 8,891 (4.64%)                        | 15,315 (2.12%)                |
| A02BA02 (Ranitidine)             | 1,287 (0.93%)                        | 7,521 (1.91%)                        | 5,566 (2.91%)                        | 14,374 (1.99%)                |

ATC: Anatomical Therapeutic Chemical Classification System.
